# Supplementary material for: Triple cation additive NH3+C2H4NH2+C2H4NH3+-induced phase-stable inorganic α-CsPbI3 perovskite films for use in solar cells
Source: Royal Society of Chemistry journal article supplement (doi:10.1039/c8ta04590a), 2018-01-01
Supplement: c8ta04590a1.pdf [file c8ta04590a1.pdf]

A Correction has been published on 15th June 2020 relating to Fig. S3 of this Supplementary Information document. Please see the accompanying Correction for further details (DOI: 10.1039/D0TA90124E).

## Supporting Information for

# Triple Cation Additive $\text{NH}_3^+\text{C}_2\text{H}_4\text{NH}_2^+\text{C}_2\text{H}_4\text{NH}_3^+$ - induced Phase-stable Inorganic $\alpha$ - $\text{CsPbI}_3$ Perovskite Films for Use in Solar Cells

Xihong Ding<sup>1</sup>, Haibin Chen<sup>1</sup>, Yahan Wu<sup>1</sup>, Shuang Ma<sup>1</sup>, Songyuan Dai<sup>1,2\*</sup>,  
Shangfeng Yang<sup>3</sup>, Jun Zhu<sup>4\*</sup>

<sup>1</sup>Beijing Key Laboratory of Novel Thin-Film Solar Cells, Beijing Key  
Laboratory of Energy Safety and Clean Utilization, North China Electric  
Power University, Beijing 102206, China

<sup>2</sup>Key Laboratory of Photovoltaic and Energy Conservation Materials,  
Hefei Institutes of Physical Science, Chinese Academy of Sciences, Hefei  
230031, China

<sup>3</sup>Department of Materials Science and Engineering, University of Science  
and Technology of China Hefei 230026, China

<sup>4</sup>National Engineering Lab of Special Display Technology, State Key Lab  
of Advanced Display Technology, Academy of Opto-Electronic  
Technology, Hefei University of Technology, Hefei, 230009, China

\*Corresponding authors:

Emails: sydai@ncepu.edu.cn; jzhu@hfut.edu.cn

## Experimental details

**Materials:** DETAI<sub>3</sub> was synthesized by reacting DETA (98%+, ACROS ORGANICS) and hydroiodic acid (>45%, Sinopharm Chemical Reagent Co. Ltd) with a molar ratio of 1:3.5 in an ice bath for 2 h with stirring. The excess hydroiodic acid was used to ensure all the DETA turn into DETAI<sub>3</sub>. The precipitate was collected by rotary evaporation at 60 °C, washed three times with copious diethyl ether until the supernatant turned to colorless, and then vacuum-dried at 50 °C for 1 h. EDAI<sub>2</sub> and PZI<sub>2</sub> were synthesized following similar procedure. The HPbI<sub>3</sub> was synthesized as previously reported.<sup>1</sup> The CsPbI<sub>3</sub>·xDETAI<sub>3</sub> precursor solution was prepared by dissolving 0.5 mmol HPbI<sub>3</sub> and 0.5 mmol of CsI (99%, TCI) in 1 ml of DMF to form a 0.5 M precursor solution mixed with different *x* ratios of 0.5 M DETAI<sub>3</sub> solution. Then the CsPbI<sub>3</sub>·xDETAI<sub>3</sub> precursor solution was filtered with a PTFE filter with 0.45 μm pore. The hole transporting material (HTM) was prepared as previous work.<sup>2</sup> In brief, 15 mg P3HT (poly(3-hexylthiophene-2,5-diyl), Rieke Metals, RMI-001EE, J&K chemical Ltd.) was dissolved in 1 mL chlorobenzene with 54 μL Li-TFSI stock solution (10 mg mL<sup>-1</sup> in acetonitrile) and 10.2 μL TBP. All the other chemicals were purchased from Sigma Aldrich and used as received without further purification. Patterned FTO glass (15 ohm sq<sup>-1</sup>, Pilkington TEC) were cleaned sequentially by ultrasonication in mild detergent,

deionized water, acetone and ethanolamine. The substrates were exposed to UV-ozone for 15 min prior to the spin coating step.

***Solar cell fabrication:*** A dense TiO<sub>2</sub> compact layer (compact-TiO<sub>2</sub>) was deposited on the cleaned FTO by spray pyrolysis with an airbrush, using N<sub>2</sub> as carrier gas, at 430 °C for 1 h from a precursor solution of 0.6 ml of titanium diisopropoxide and 0.4 ml of bis (acetylacetonate) in 7 ml of anhydrous isopropanol. The CsPbI<sub>3</sub>·xDETAI<sub>3</sub> precursor solutions were then spin-coated onto the prewarmed bl-TiO<sub>2</sub>-coated substrate at 3500 rpm for 30 s, followed by annealing at 150 °C for 40 min. After the films were cooled down to room temperature, a layer of HTM was spin-coated at 4600 rpm for 20 s. Finally, a 60-nm-thick Au contact layer was thermally evaporated as back contact. All of the processes were performed in air ambient at a relative humidity <25%.

***Characterization:*** Devices were tested in air ambient. The solar simulators are Newport Oriel Sol3A solar simulators with Xenon lamps. A calibrated Si reference solar cell was used to set the intensity of the lamp to 100 mW cm<sup>-2</sup> AM 1.5 conditions. Current density–voltage (*J–V*) scans were taken from forward bias to reverse bias with a scan rate of 200 mV s<sup>-1</sup> (scan parameters: step size = 20 mV, delay time =10 ms). Devices were illuminated for 5 s prior to starting the *J–V* sweep. To minimize possible *J*<sub>SC</sub> overestimation from current collecting outside the device area, a mask was used, and the equivalent current densities were achieved for the solar

cell. Stabilized power output was measured by holding the device at a constant voltage corresponding to the voltage at the maximum power point of the  $J-V$  scan. IPCE spectra were recorded under illumination of monochromatic light from the halogen tungsten lamp using a monochromator (Enlitech, Taiwan) and detected by a computer-controlled lock-in amplifier. XRD patterns were collected by a Rigaku diffractometer (RINT-TTR III) with Cu  $K_{\alpha}$  radiation ( $k = 1.54056$  ). UV-Vis absorption spectra were recorded by an ultraviolet-visible-near-infrared spectrometer (SolidSpec-3700/3700DUV, Shimadzu). XPS measurement was taken on a Thermo Scientific K-Alpha XPS instrument with Al  $K_{\alpha}$  radiation ( $h\nu = 1486.68$  eV). SEM images were collected using a Zeiss SEM (EVO18). Raman spectroscopy was performed by Renishaw inVia Reflex with a laser of 785 nm. Fourier transform infrared spectroscopy (FT-IR, ThermoFisher IS50R, USA) was used to collect the spectral data for various solution in the range of 4000-500  $\text{cm}^{-1}$ . PL spectra were performed using a standard 450 W Xenon CW lamp, and the TRPL were recorded on a pulsed nitrogen/dye laser (QM400, Photo Technology International, USA.). The contact angle measurement was performed using OCA15EC with water.

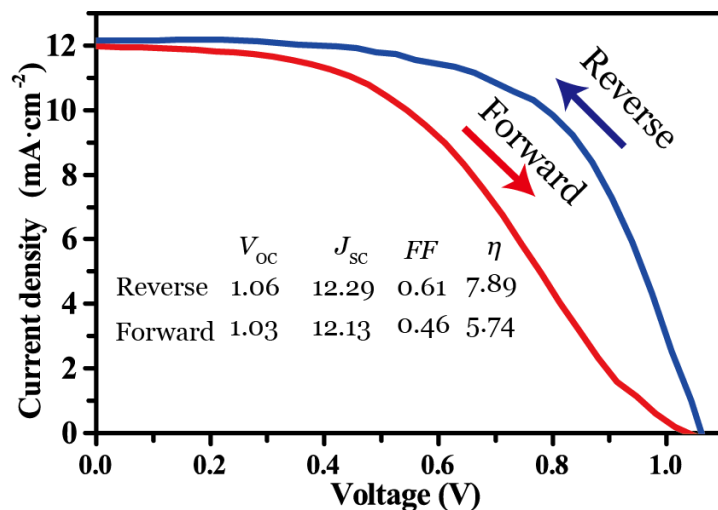

**Figure S1.** A typical forward and reverse scan  $J$ - $V$  curve of the perovskite solar cells based on  $\text{CsPbI}_3$  0.05 $\text{DETAI}_3$  samples.

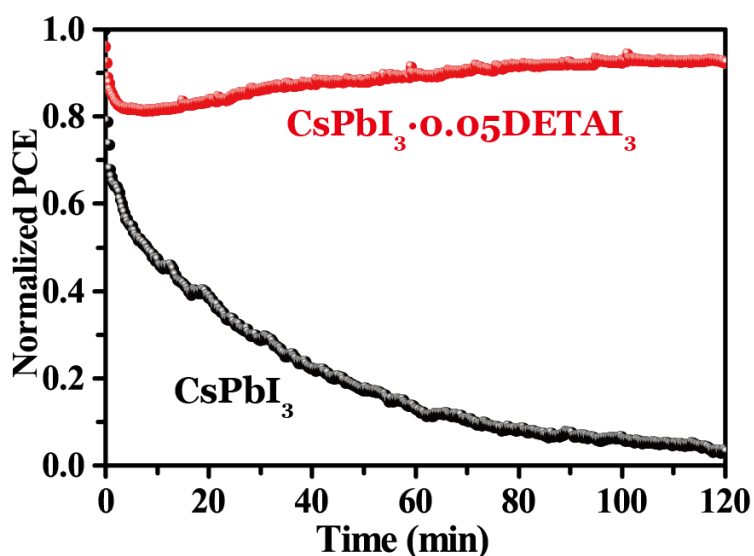

**Figure. S2** Operational stability of un-encapsulated  $\text{CsPbI}_3 \cdot x\text{DETAI}_3$  ( $x=0, 0.05$ ) PSC at bias voltage of 0.54 V and 0.83 V, respectively, for 120 min. (examined at a maximum-power-point under continuous full-sun illumination at  $\sim 30^\circ\text{C}$ , 60-70% RH in ambient air)

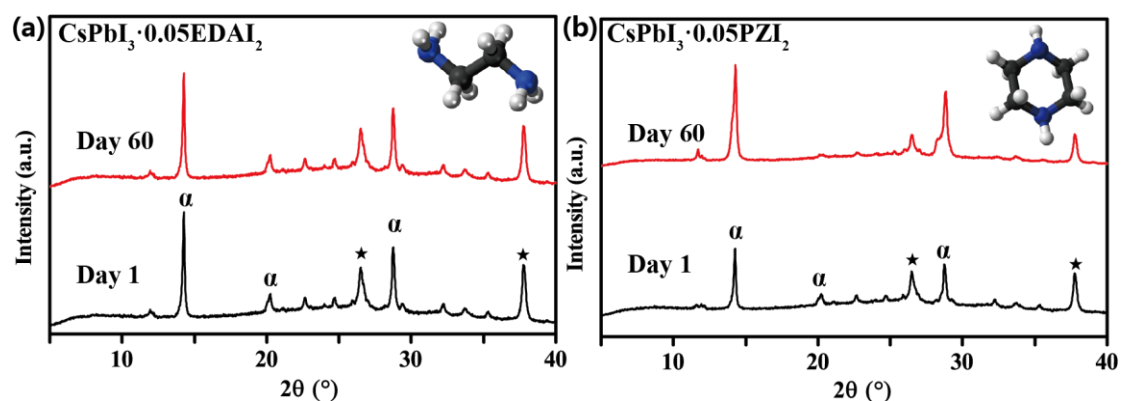

**Figure S3.** a) XRD patterns of  $\text{CsPbI}_3 \cdot 0.05\text{EDAI}_2$  films of day 1 and day 60 stored in a dark dry box, inset image is the structure of ethylenediamine. b) XRD patterns of  $\text{CsPbI}_3 \cdot 0.05\text{PZI}_2$  films of day 1 and day 60 stored in a dark dry box, inset image is the structure of pyrazine.

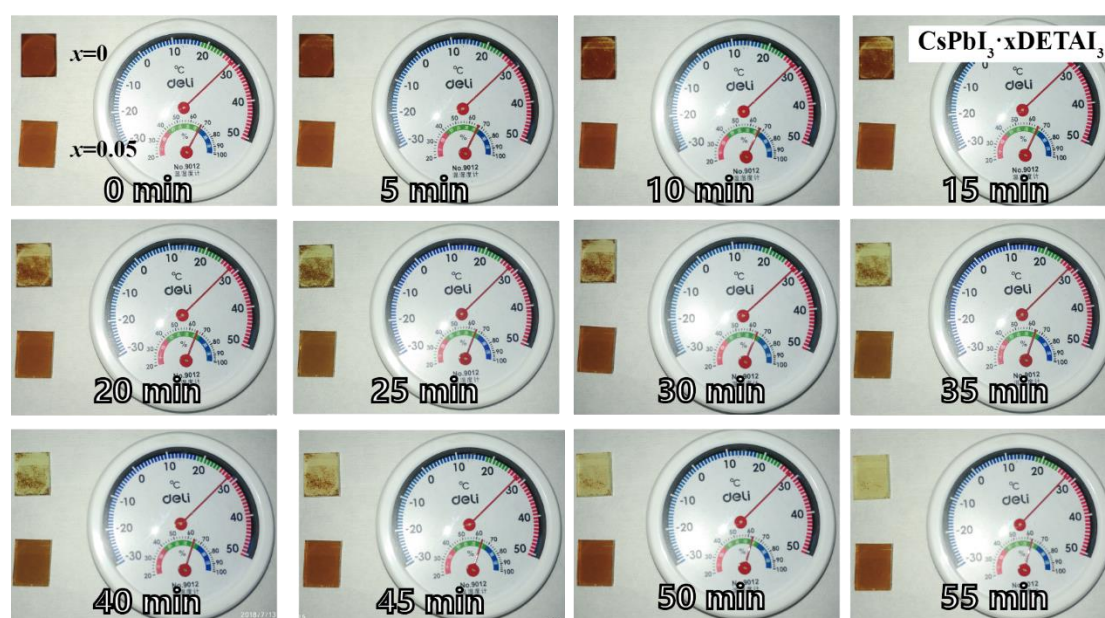

**Figure S4.** Photographs of  $\text{CsPbI}_3 \cdot x\text{DETAI}_3$  ( $x=0, 0.05$ ) in humid environment ( $\sim 30^\circ\text{C}$ , 60-70% RH)

### Note 1

“A dark dry box” we noted in this paper was referred to a dark dry box with 15-20% RH and a temperature of 25-30 °C.

## Reference

(1) Wang, F.; Yu, H.; Xu, H.; Zhao, N. HPbI<sub>3</sub>: A New Precursor Compound for Highly Efficient Solution - Processed Perovskite Solar Cells. *Adv. Funct. Mater.* **2015**, *25*, 1120-1126.

(2) Zeng, Q.; Zhang, X.; Feng, X.; Lu, S.; Chen, Z.; Yong, X.; Redfern, S. A. T.; Wei, H.; Wang, H.; Shen, H.; Zhang, W.; Zheng, W.; Zhang, H.; Tse, J. S.; Yang, B. Polymer-Passivated Inorganic Cesium Lead Mixed-Halide Perovskites for Stable and Efficient Solar Cells with High Open-Circuit Voltage over 1.3 V. *Adv. Mater.* **2018**, *30*, 1705393.
